# Supplementary material
Source: HighWire-hosted journal article supplement (https://www.genetics.org/content/suppl/2015/07/17/genetics.115.179382)
Supplement: genetics.115.179382-2.pdf [file genetics.115.179382-2.pdf]

**Table S4: List of rescue templates**

| Gene            | crRNA       | Description                                        | Sequence                                                                                                                      |
|-----------------|-------------|----------------------------------------------------|-------------------------------------------------------------------------------------------------------------------------------|
| <i>dpy-10</i>   | 589         | Co-CRISPR misense mutation                         | ssODN from Arribere <i>et al.</i> 2014 (See Suppl. File S1)                                                                   |
| <i>gtbp-1</i>   | 728         | Ollas tag insertion at the STOP codon              | GGCGGTTGCGGTGGTCTCCACGAGGAGGAATGCGTAGCGGTTTCCAAAATGCGGGAC<br>AAAAT---Ollas---tagaagcttccgttctcttttctcttctgtaag                |
| <i>gtbp-1</i>   | 728         | mTagGFP::TEV::3Xflag insertion at the STOP codon   | GGCGGTTGCGGTGGTCTCCACGAGGAGGAATGCGTAGCGGTTTCCAAAATGCGGGAC<br>AAAAT---mTagGFP::TEV::3Xflag---tagaagcttccgttctcttttctcttctgtaag |
| <i>gtbp-1</i>   | 728         | mCherry insertion at cut                           | GGTTCGGGTGGTGTCTCCACGAGGTGGTATGCGC---mCherry---<br>AGCGGTTTCCAAAATGCGGGACAAAATtagaag                                          |
| <i>gtbp-1</i>   | 772         | mCherry insertion at cut                           | CTTCGCGGTGGCGGTTCGGGTGGTGTCTCCACGA---mCherry---<br><b>GGTGGT</b> ATGCGCAGCGGTTTCCAAAATGCGGGAC                                 |
| <i>gtbp-1</i>   | 728         | eGFP insertion at cut                              | GGTTCGGGTGGTGTCTCCACGAGGTGGTATGCGC---eGFP---<br>AGCGGTTTCCAAAATGCGGGACAAAATtagaag                                             |
| <i>fbf-2</i>    | 689         | tagRFP insertion at cut (STOP codon)               | CAAATTTTCTTCTCCGGTAGTCACGGCGATGAT---tagRFP---<br><u>taggtgga</u> acttctcaccataaatctcatcc                                      |
| <i>GFP/eGFP</i> | 719 and 720 | Replacement by tagRFP                              | GGAGAAGAACTTTTCACTGGAGTTGTCCCAATT---tagRFP---<br><u>GTCCTTCTGAGTTT</u> GTAACAGCTGCTGGGATTAC                                   |
| <i>glh-1</i>    | 723         | tagRFP insertion at the STOP codon                 | CCAGTGACCAACTCAAGTCCCTCAAGACGAGGAAGGATGG---tagRFP---<br>tagaaaaccgaccaattgatagtgtttcgatttataatgc                              |
| <i>htp-3</i>    | 699         | TEV::eGFP::myc::3Xflag insertion at the STOP codon | CCAGTCGCCGAACATGCCAAGTAGAAGAGGAAAC---TEV::eGFP::myc::3Xflag---<br><u>tgaacgatttctgg</u> acaatcgtgtacaattatc                   |
| <i>gtbp-1</i>   | 691 and 728 | <i>gtbp-1</i> replacement by GFP::H2B              | aaATGCAGATAACCTCGGCCTTAACCCAGAATAAG---GFP::H2B---<br><u>taacagcgg</u> tttccaaaatgctgggacaaaattagaagc                          |

Lower case (non-coding), upper case (coding), red (silent mutations in the repair template to prevent Cas9 re-cutting), blue (insertion), bold (PAM sequence), underlined (crRNA sequence).
